# Supplementary material for: Quantitative Assessment of Tumor-Infiltrating Lymphocytes Using Machine Learning Predicts Survival in Muscle-Invasive Bladder Cancer
Source: MDPI journal article supplement (doi:10.3390/jcm11237081), 2022-11-29

## *Supplementary Materials*

### Supplementary Table S1

Features incorporated by neural network-driven cell classifiers.

---

|                                   |
|-----------------------------------|
| Nucleus: Area                     |
| Nucleus: Perimeter                |
| Nucleus: Circularity              |
| Nucleus: Max caliper              |
| Nucleus: Min caliper              |
| Nucleus: Eccentricity             |
| Nucleus: Hematoxylin OD mean      |
| Nucleus: Hematoxylin OD sum       |
| Nucleus: Hematoxylin OD std dev   |
| Nucleus: Hematoxylin OD max       |
| Nucleus: Hematoxylin OD min       |
| Nucleus: Hematoxylin OD range     |
| Nucleus: Eosin OD mean            |
| Nucleus: Eosin OD sum             |
| Nucleus: Eosin OD std dev         |
| Nucleus: Eosin OD max             |
| Nucleus: Eosin OD min             |
| Nucleus: Eosin OD range           |
| Cell: Area                        |
| Cell: Perimeter                   |
| Cell: Circularity                 |
| Cell: Max caliper                 |
| Cell: Min caliper                 |
| Cell: Eccentricity                |
| Cell: Hematoxylin OD mean         |
| Cell: Hematoxylin OD std dev      |
| Cell: Hematoxylin OD max          |
| Cell: Hematoxylin OD min          |
| Cell: Eosin OD mean               |
| Cell: Eosin OD std dev            |
| Cell: Eosin OD max                |
| Cell: Eosin OD min                |
| Cytoplasm: Hematoxylin OD mean    |
| Cytoplasm: Hematoxylin OD std dev |
| Cytoplasm: Hematoxylin OD max     |
| Cytoplasm: Hematoxylin OD min     |
| Cytoplasm: Eosin OD mean          |
| Cytoplasm: Eosin OD std dev       |

---

---

Cytoplasm: Eosin OD max  
Cytoplasm: Eosin OD min  
Nucleus/Cell area ratio  
Smoothed: 25 µm: Nucleus: Area  
Smoothed: 25 µm: Nucleus: Perimeter  
Smoothed: 25 µm: Nucleus: Circularity  
Smoothed: 25 µm: Nucleus: Max caliper  
Smoothed: 25 µm: Nucleus: Min caliper  
Smoothed: 25 µm: Nucleus: Eccentricity  
Smoothed: 25 µm: Nucleus: Hematoxylin OD mean  
Smoothed: 25 µm: Nucleus: Hematoxylin OD sum  
Smoothed: 25 µm: Nucleus: Hematoxylin OD std dev  
Smoothed: 25 µm: Nucleus: Hematoxylin OD max  
Smoothed: 25 µm: Nucleus: Hematoxylin OD min  
Smoothed: 25 µm: Nucleus: Hematoxylin OD range  
Smoothed: 25 µm: Nucleus: Eosin OD mean  
Smoothed: 25 µm: Nucleus: Eosin OD sum  
Smoothed: 25 µm: Nucleus: Eosin OD std dev  
Smoothed: 25 µm: Nucleus: Eosin OD max  
Smoothed: 25 µm: Nucleus: Eosin OD min  
Smoothed: 25 µm: Nucleus: Eosin OD range  
Smoothed: 25 µm: Cell: Area  
Smoothed: 25 µm: Cell: Perimeter  
Smoothed: 25 µm: Cell: Circularity  
Smoothed: 25 µm: Cell: Max caliper  
Smoothed: 25 µm: Cell: Min caliper  
Smoothed: 25 µm: Cell: Eccentricity  
Smoothed: 25 µm: Cell: Hematoxylin OD mean  
Smoothed: 25 µm: Cell: Hematoxylin OD std dev  
Smoothed: 25 µm: Cell: Hematoxylin OD max  
Smoothed: 25 µm: Cell: Hematoxylin OD min  
Smoothed: 25 µm: Cell: Eosin OD mean  
Smoothed: 25 µm: Cell: Eosin OD std dev  
Smoothed: 25 µm: Cell: Eosin OD max  
Smoothed: 25 µm: Cell: Eosin OD min  
Smoothed: 25 µm: Cytoplasm: Hematoxylin OD mean  
Smoothed: 25 µm: Cytoplasm: Hematoxylin OD std dev  
Smoothed: 25 µm: Cytoplasm: Hematoxylin OD max  
Smoothed: 25 µm: Cytoplasm: Hematoxylin OD min  
Smoothed: 25 µm: Cytoplasm: Eosin OD mean  
Smoothed: 25 µm: Cytoplasm: Eosin OD std dev  
Smoothed: 25 µm: Cytoplasm: Eosin OD max  
Smoothed: 25 µm: Cytoplasm: Eosin OD min  
Smoothed: 25 µm: Nucleus/Cell area ratio

---

---

Smoothed: 25 µm: Nearby detection counts  
Smoothed: 50 µm: Nucleus: Area  
Smoothed: 50 µm: Nucleus: Perimeter  
Smoothed: 50 µm: Nucleus: Circularity  
Smoothed: 50 µm: Nucleus: Max caliper  
Smoothed: 50 µm: Nucleus: Min caliper  
Smoothed: 50 µm: Nucleus: Eccentricity  
Smoothed: 50 µm: Nucleus: Hematoxylin OD mean  
Smoothed: 50 µm: Nucleus: Hematoxylin OD sum  
Smoothed: 50 µm: Nucleus: Hematoxylin OD std dev  
Smoothed: 50 µm: Nucleus: Hematoxylin OD max  
Smoothed: 50 µm: Nucleus: Hematoxylin OD min  
Smoothed: 50 µm: Nucleus: Hematoxylin OD range  
Smoothed: 50 µm: Nucleus: Eosin OD mean  
Smoothed: 50 µm: Nucleus: Eosin OD sum  
Smoothed: 50 µm: Nucleus: Eosin OD std dev  
Smoothed: 50 µm: Nucleus: Eosin OD max  
Smoothed: 50 µm: Nucleus: Eosin OD min  
Smoothed: 50 µm: Nucleus: Eosin OD range  
Smoothed: 50 µm: Cell: Area  
Smoothed: 50 µm: Cell: Perimeter  
Smoothed: 50 µm: Cell: Circularity  
Smoothed: 50 µm: Cell: Max caliper  
Smoothed: 50 µm: Cell: Min caliper  
Smoothed: 50 µm: Cell: Eccentricity  
Smoothed: 50 µm: Cell: Hematoxylin OD mean  
Smoothed: 50 µm: Cell: Hematoxylin OD std dev  
Smoothed: 50 µm: Cell: Hematoxylin OD max  
Smoothed: 50 µm: Cell: Hematoxylin OD min  
Smoothed: 50 µm: Cell: Eosin OD mean  
Smoothed: 50 µm: Cell: Eosin OD std dev  
Smoothed: 50 µm: Cell: Eosin OD max  
Smoothed: 50 µm: Cell: Eosin OD min  
Smoothed: 50 µm: Cytoplasm: Hematoxylin OD mean  
Smoothed: 50 µm: Cytoplasm: Hematoxylin OD std dev  
Smoothed: 50 µm: Cytoplasm: Hematoxylin OD max  
Smoothed: 50 µm: Cytoplasm: Hematoxylin OD min  
Smoothed: 50 µm: Cytoplasm: Eosin OD mean  
Smoothed: 50 µm: Cytoplasm: Eosin OD std dev  
Smoothed: 50 µm: Cytoplasm: Eosin OD max  
Smoothed: 50 µm: Cytoplasm: Eosin OD min  
Smoothed: 50 µm: Nucleus/Cell area ratio  
Smoothed: 50 µm: Nearby detection counts

---

## Supplementary Figure S1

(a) In each whole slide image, the entire tumor region of one whole image selected by the pathologists for each patient was annotated and analyzed. The details of tumor region areas analysed in the (b) RHWU cohort and (c) TCGA cohort are shown.

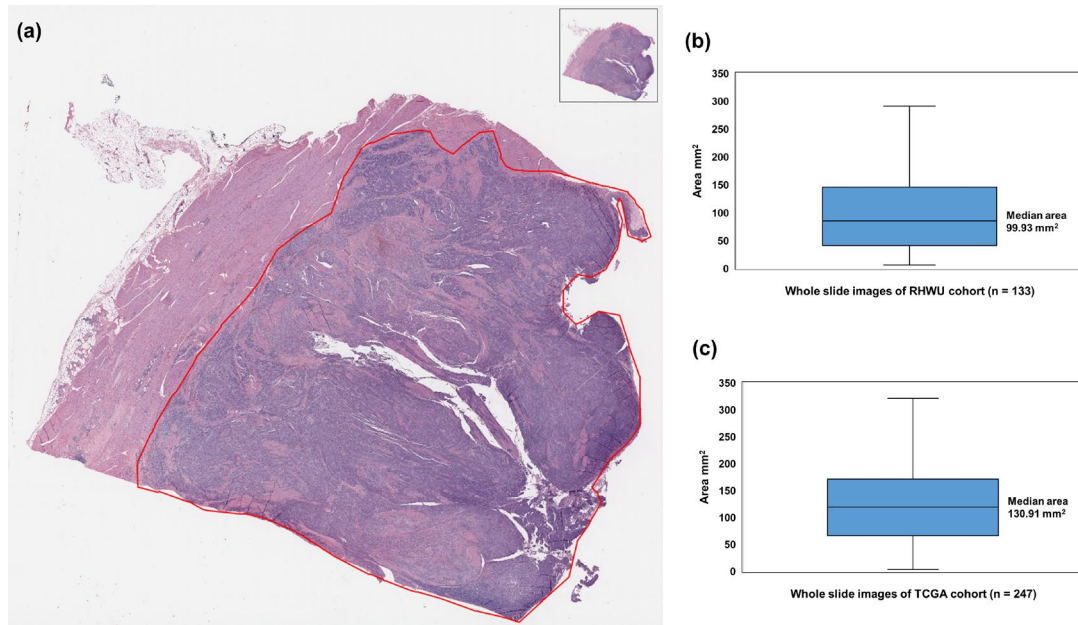

Supplement: s1 [file s1]
